# Supplementary material for: Modulatory mechanisms of long-term volleyball practice on visuospatial working memory capacity: an fNIRS study
Source: PeerJ. 2025 Mar 31;13:e19153. doi: 10.7717/peerj.19153 (PMC11967431; doi:10.7717/peerj.19153)
Supplement: Supplemental Information 1 [file peerj-13-19153-s001.xlsx]

## Sheet: Sheet1
	fNIRS Date——Novice Group
	channel 1	channel 2	channel 3	channel 4	channel 5	channel 6	channel 7	channel 8	channel 9	channel 10	channel 11	channel 12	channel 13	channel 14	channel 15	channel 16	channel 17	channel 18	channel 19	channel 20	channel 21	channel 22
	0.00974535	0.0111214	0.0106119	0.0123818	0.00798372	0.00486599	0.00214281	0.0159662	0.0148259	0.00989371	0.0121413	0.0153805	0.010535	0.00955098	0.00256077	0.0133437	0.0137929	0.0108296	0.0199194	0.013334	0.00946205	0.00241981
	0.00410186	0.00650183	0.00818325	0.00380516	0.00230564	0.00201966	0.00681301	0.0076102	0.0135755	0.0047795	0.00434707	0.00169022	0.000684726	0.00339487	0.0102016	0.00737038	0.00445949	0.00388924	0.00119554	-0.0019168	0.00114708	0.0146617
	0.00042322	-0.00282394	0.00585713	0.00160221	0.001531	-0.00206544	0.0024632	0.0145285	-0.00193993	0.00219959	0.00237325	-0.00409277	0.00260052	0.00309264	0.030069	-0.00126131	-0.00442413	0.000680302	-0.00253264	0.00060899	0.000103831	0.0172694
	0.00727009	0.0145298	0.0225034	0.0170189	0.024875	0.0171107	0.00926022	0.0116839	0.0164923	0.0193611	0.0228037	0.0218986	0.0219851	0.0165643	0.00492824	0.0152958	-0.000227272	0.0182596	0.0223222	0.0152447	0.0188052	0.014647
	0.00597843	0.000879725	0.00120516	0.000984199	2.85951e-05	0.00138756	0.0138331	0.00688819	0.00775557	0.00388378	0.00330402	0.000278596	0.00231267	0.00608039	0.000246061	0.00688551	0.0058717	0.00210815	0.00131833	0.00241257	0.00754463	0.013539
	0.00872875	0.00168395	0.00233473	0.000669783	0.00211035	-0.000862345	0.00189277	-0.00392194	0.0049292	-0.00531601	0.00134953	-0.00326999	-0.000564972	-0.00281613	-0.0115016	-0.00213711	-0.00452423	-0.0206967	0.00223867	-0.00532793	0.000649865	-0.00719651
	0.0110642	0.0144693	0.0143474	0.00961508	0.00857129	0.0110436	-1.83348e-05	0.0216684	0.00785946	-0.0011994	0.00153131	-0.0053332	-0.0079699	7.42821e-05	0.0112281	0.0259912	0.00466448	-0.000771815	-0.00325779	-0.00220478	-0.00173091	0.0114852
	0.00116133	0.00662071	0.00785367	-0.00424771	0.00261866	0.0066546	0.00499169	-0.0056996	-0.00180891	0.0019221	0.00608494	-0.0154792	-0.00325057	0.00872882	0.0066197	0.00129942	0.00195835	0.00812624	0.0156484	0.0107405	0.0143758	0.006723
	0.00298085	0.013823	0.00965145	0.0108566	0.0101567	0.0111599	0.00317513	0.0044272	0.0114533	0.00905021	0.00695862	0.0121322	0.00495184	0.00208725	0.00230246	0.00543939	0.0131708	0.00744708	0.00683259	0.00407775	0.00813663	0.000188301
	-0.00195746	-0.00357325	-0.00347593	-0.00407157	-0.00348332	-0.00314892	-0.00339531	-0.00556278	-0.00659041	-0.00367187	-0.00768935	-0.00746854	-0.00241479	-0.00349545	-0.00187821	-0.0105079	-0.00718498	-0.0108715	-0.016818	-0.00956835	-0.0058532	-0.00833878
	0.00983105	0.00788356	0.00866898	0.0136347	0.00946427	0.00840394	0.0111331	0.00973073	0.0050971	0.00788861	0.0147368	0.00842082	0.00523257	0.00216686	0.0186126	0.0083466	0.0106449	0.00564505	0.00982139	0.00574819	0.00578121	0.00756944
	0.00342221	0.00348337	0.00292933	0.00591301	0.00136205	0.0066016	0.00631323	0.00513313	-0.00847881	-0.00719127	0.000107791	0.00363047	0.00158597	0.000884644	-0.00335037	-0.019893	-0.00831982	-0.00569849	0.00854377	-0.00313101	-0.00691062	-0.0120009
	-0.0056191	0.001653	0.00585217	-0.00412741	0.00316052	0.00278775	0.00267825	-0.00810101	-0.00193075	0.00465493	0.00638889	0.00614462	0.00291372	-0.000593595	-0.00849536	-0.00110466	0.00469004	0.005974	0.00760554	0.00441647	0.00142383	-0.00600796
	0.00572661	0.005307	0.00416542	0.00227298	0.000237747	-0.00178209	0.00295694	0.00859591	0.00941695	-8.99655e-05	0.00447013	0.00222211	0.00365407	0.00305792	0.00840275	0.00752048	0.00582501	0.00886498	0.00292183	0.0019624	0.00582317	0.0162392
	-0.000946377	0.00324676	9.04582e-05	0.000293172	-0.000131707	-0.000136477	-0.00172269	0.000438209	-0.000505339	0.00133097	0.000364185	-0.000559837	0.000793052	-0.00121757	0.000654516	0.000492993	-0.0024264	0.000398758	-0.00058089	0.000601323	0.00140729	-0.00389797
	-0.00516074	-0.0111956	-0.00626238	0.00109436	-0.00742486	-0.00637499	-0.00191281	-0.00477032	-0.0047149	-0.00521066	-0.00709489	-0.00543066	-0.00721521	-0.00685531	0.00182113	-0.0079903	-0.00345016	-0.000998225	-0.00193689	-0.000866241	-0.00754118	0.000307791
	-0.00153432	-0.0113315	-0.023146	0.00138095	-0.00822069	-0.0087668	-0.00593922	0.0012975	-0.0121062	-0.00767699	0.00330576	-0.000467623	-0.0090272	-0.0042075	0.000890006	-0.00335515	-0.000783629	-0.00707569	-0.0111032	-0.00820629	-0.00699252	-0.00010459
	0.000872681	0.0196242	0.0178258	0.0225094	0.014922	0.0153593	0.00615967	-0.00112253	0.00316246	0.0208791	0.0214125	0.0143098	0.0181835	0.00786822	-0.00697335	0.00416789	0.0205598	0.017864	0.0128162	0.00809487	0.016402	-0.0079073
	0.00707672	0.00103192	0.00286144	0.000202396	-0.00221949	0.00237057	0.00297992	-0.00895816	0.00176146	0.000258441	0.0027582	-0.000352052	0.00383922	0.00106194	0.000305911	-0.000227574	0.00381308	7.10965e-05	0.00589199	0.00406524	0.00523211	-0.00067236
	0.000785657	0.00174482	-0.00337725	0.00517982	0.0027441	0.00103495	0.0020235	-0.000857137	0.00195968	-0.0277129	0.00863607	0.00145855	0.00141937	0.00114997	-0.00255384	-0.0167683	-0.00212368	0.0235207	0.0164829	-0.00303454	0.00252382	0.00286752
	0.00417724	0.00153136	-0.00115759	-0.000678379	-0.00122806	-0.000810781	6.283e-05	0.00355736	0.00382166	-0.00187799	-0.0019425	4.91427e-05	-0.000709414	0.0010114	0.00038711	0.00175609	-0.00191954	-0.000502944	-0.000457622	-0.00106518	0.00142707	0.00061708
	0.00345712	0.000849496	0.0028143	0.00402713	0.00129198	0.00111561	0.00385306	0.0063704	0.00319609	0.000109029	0.00276055	0.00431116	0.0027048	0.00285514	0.00701373	0.00296797	-0.000501271	0.00468624	0.00508524	0.00407085	0.00412026	0.00314175
	0.000993457	0.00274334	0.00450129	0.00225517	0.000599639	0.000556106	-0.00192793	0.000460054	0.00245539	-0.00364936	0.00307044	0.000427507	0.00353618	0.00121024	0.000493179	0.00201039	0.00431777	-0.0058084	-0.000422792	0.002912	0.000831075	0.000162952
	fNIRS Date——Expert group
	channel 1	channel 2	channel 3	channel 4	channel 5	channel 6	channel 7	channel 8	channel 9	channel 10	channel 11	channel 12	channel 13	channel 14	channel 15	channel 16	channel 17	channel 18	channel 19	channel 20	channel 21	channel 22
	0.0031293	0.000398707	-0.00250356	0.00416573	-0.00253019	0.000534418	-0.00317987	-0.000604624	-9.58835e-05	0.000376455	0.00712591	0.00510021	-0.00223485	-0.000262326	-0.0135379	-0.00369035	-0.00226721	0.000202557	0.0103091	-0.00153842	-0.00308669	-0.00966513
	0.000168973	0.00783782	0.00255417	0.0087684	0.00922591	0.00405315	0.00430673	0.00294255	0.00302825	0.00838991	0.00948598	0.00781345	0.0055699	0.00345608	0.00170972	0.00189599	0.00798555	0.00609952	0.00799937	0.0100581	0.00279006	-0.00134157
	-0.00774115	-0.00523267	-0.00578843	-0.00584357	-0.00448192	-0.00387289	0.00320514	-0.00349915	-0.00777033	-0.00866856	-0.00556263	-0.00478916	-0.00463491	0.00228968	0.00812775	-0.00136449	-0.00354602	-0.00338624	-0.00774449	-0.00850828	-0.00574876	0.00934961
	-0.00197155	-0.000644145	-0.000689975	-0.00169662	-0.00108774	-0.000973569	-0.00237192	0.000146698	-0.00113253	-0.000770278	-0.000255943	-0.00108211	-0.00140294	-0.00218069	0.00273554	-0.0018898	-0.00140019	-0.000327194	-0.000881353	0.000547253	-0.000467595	0.00305469
	0.00572307	0.00690128	0.00592741	0.0122474	0.00388875	0.00687408	0.00332354	0.00255181	0.00567388	0.00652688	-0.00141587	-0.00864322	0.00530783	0.0121463	0.00865373	0.0076967	0.0090163	0.0139724	0.0162073	-0.0443457	0.00688839	0.0112781
	-0.00651416	0.00216524	0.00367604	0.003671	0.00341129	-0.0003973	-0.0109994	-0.00883857	0.00167483	0.00113085	0.00132287	0.000203173	0.00215164	-0.00359542	-0.0082918	-0.00475324	1.6489e-05	0.00126108	0.000852392	-0.00140058	-0.000446694	-0.014085
	-0.00416788	-0.00624187	-0.00862684	-0.00348442	-0.00499173	-0.00274196	-0.00322228	-0.00285862	-0.00496638	-0.00421916	-0.00482265	0.000618332	-0.00432015	-0.00364995	-0.00410662	-0.00362562	-0.00417827	-0.00519378	-0.00654442	0.00126417	-0.00731853	-0.00314674
	-0.00298544	-0.0076255	-0.012365	-0.00843115	-0.0094693	-0.00257561	0.00530276	0.000382162	-0.00771914	-0.00231908	-0.0129699	-0.00481921	-0.00725208	-0.00097119	-0.00225209	-0.0048093	-0.00756619	-0.00322457	-0.0145472	-0.00824267	-0.00370093	0.00219826
	-0.00416181	-0.00109591	-0.00254074	-0.00225528	0.000125341	-0.000205233	-0.00563356	-0.00643447	-0.0033594	-0.00360535	-0.00381418	-0.00136759	-0.000355011	-0.00814419	-0.00461811	-0.00495828	-0.00685572	-0.00355134	-0.00383254	0.000191023	-0.00945243	-0.00232837
	-0.00294368	-0.00429513	0.000347839	7.30873e-05	0.00429011	0.00226806	-0.00218173	-0.00664344	-0.00339245	0.00029752	-0.000972423	0.00499967	0.00213164	0.00287346	-0.00536494	-0.00206268	-0.000129073	0.00505953	0.00179693	0.00797126	0.00176707	-0.00295291
	-0.00643689	-0.0058322	-0.00712911	-0.00556412	-0.0044403	-0.00661689	-0.00758457	-0.00608919	-0.00541009	-0.00706806	-0.00601453	-0.00564124	-0.00717399	-0.00844326	-0.00319985	-0.00323772	-0.00453185	-0.00618302	-0.00560429	-0.00564447	0.00526257	-0.00599004
	0.00767263	0.00246616	0.000788369	0.00360256	0.00827593	0.00764363	0.0272609	0.0294762	0.000808885	0.00597881	0.00533474	0.0117132	0.0130708	0.00835654	0.0223876	0.00183333	0.00912595	0.0217614	0.0126888	0.017086	0.0148491	0.0100035
	0.0133694	-0.00986523	0.00431558	0.00599483	0.00666828	0.00441691	0.00220278	0.0120622	-0.00538253	0.00497797	0.00643038	0.00526151	0.00643434	0.00458651	0.00131872	0.0068235	-0.00433744	0.00265993	0.00497811	0.0028398	0.00261943	0.00394581
	-0.00244046	5.92092e-05	0.004311	0.00432702	0.00750731	0.0045623	-0.00171783	-0.00964716	0.000749865	0.00168049	0.0012983	0.00264506	0.0081326	-0.0018163	-0.0119844	-0.000781475	0.00158888	0.00452517	0.00514152	0.00633102	-0.00287469	-0.00414003
	0.000994817	0.00594491	0.0107141	0.00567561	0.00399026	0.00313053	0.0136174	0.00928989	0.00248187	0.00776321	0.00744475	0.00662295	0.0077287	0.0116918	0.0172408	0.0130812	0.000284116	0.00975448	0.00856865	0.0149674	0.00720418	0.0185172
	-0.00241582	-0.00243377	-0.00188436	-0.00175954	-0.00145945	-0.00381212	-0.00478861	-0.00574536	-0.00173623	-0.00146279	-0.00242971	-0.00212729	-0.00487264	-0.00505228	-0.00218614	0.00039681	0.000652852	0.00124305	-0.00132659	-0.00212446	0.00582335	-0.0039136
	-0.00244158	-0.00403753	-0.00155054	-0.00297887	-0.00287096	-0.00455916	-0.00338398	-0.0132613	-0.0023008	0.00053839	-0.00270677	1.90685e-05	0.000207357	-0.00539481	-0.00899608	-0.00259364	0.00221806	0.00392611	0.00111194	0.00694238	0.00141358	-0.00787707
	0.00480801	0.00454572	0.00622417	0.00754112	0.00694958	0.00405076	0.00452942	0.00408186	0.00949339	0.00875514	0.00552766	0.00227142	0.0063158	0.00733869	0.0029288	0.00930569	0.00826542	0.0140171	0.00576631	0.0175062	0.00834872	0.00452336
	-0.00774115	-0.00523267	-0.00578843	-0.00584357	-0.00448192	-0.00387289	0.00320514	-0.00349915	-0.00777033	-0.00866856	-0.00556263	-0.00478916	-0.00463491	0.00228968	0.00812775	-0.00136449	-0.00354602	-0.00338624	-0.00774449	-0.00850828	0.00574876	0.00934961
	-0.00884915	-0.00991606	-0.0102306	-0.0128673	-0.0191926	-0.0166627	-0.015293	-0.0130806	-0.0193853	-0.0131272	-0.0122067	-0.0123476	-0.0183677	-0.0166087	-0.00936774	-0.0229558	-0.00960786	-0.0131258	-0.0115715	-0.0170028	-0.0172657	-0.0196313
	-0.0208502	-0.02217	-0.00823198	0.00207851	-0.0136683	-0.00550028	-0.0107893	-0.011191	-0.0111717	-0.0188219	0.00028835	-0.0158609	-0.00968279	-0.00764343	-0.00188246	-0.0246354	-0.0131933	-0.0235902	-0.029432	-0.0211157	-0.0104095	-0.00176515
	-0.0038503	-0.0211126	-0.0224942	0.00289299	-0.0157343	-0.0201418	-0.0141648	0.00105572	-0.0193922	-0.0206759	-0.0177	-0.0114702	-0.0184644	-0.0231734	-0.00521743	-0.0166308	-0.0184253	-0.0076761	-0.0115758	-0.00591736	-0.0160323	-0.0115743
	-0.00389486	-0.0029374	0.00366395	-0.0222087	-0.00977514	-0.00992793	-0.0205989	-0.0118032	-0.00150979	-0.00262009	-0.013782	-0.0112205	-0.0162571	-0.0116644	-0.0127593	-0.0159026	-0.00778252	-0.00377678	-0.00382199	-0.00338784	-0.00993627	-0.00589473
		Behavioral Date
		Expert Group			Novice Group
		Accuracy	Reaction Time		Accuracy	Reaction Time
		0.87	1292.21		0.77	1409.67
		0.77	1126.08		0.73	1106.92
		0.87	1444.29		0.7	1229.88
		0.9	1021.75		0.77	1171.96
		0.83	1018.42		0.87	1265.75
		0.87	1369.46		0.77	1272.15
		0.8	1111.71		0.87	1279.92
		0.8	971.31		0.77	1294.42
		0.8	1091.56		0.7	1329.85
		0.8	1209.67		0.7	1379.77
		0.87	1146.92		0.8	1170.98
		0.8	1341.27		0.87	1312.54
		0.8	1376.88		0.77	1134.69
		0.9	984.63		0.87	1318.38
		0.87	1030.04		0.8	1166.72
		0.8	1184.88		0.7	1209.48
		0.77	1262.31		0.8	1270.04
		0.83	1054.97		0.87	1329.48
		0.87	1145.1		0.8	1301.83
		0.8	1213.71		0.87	1247.85
		0.8	1205.31		0.77	1384.1
		0.77	1549.47		0.87	1669.02
		0.9	1445.51		0.8	1412.63
